# Supplementary material for: An integrated bioinformatics analysis of potential therapeutic targets among matrix metalloproteinases in breast cancer
Source: PubMed Central journal article supplement — Oncol Lett. 2019 Jul 26;18(3):2985–94. doi: 10.3892/ol.2019.10669 (PMC6704324; doi:10.3892/ol.2019.10669), 2019-07-26
Supplement: Supplementary_Data.pdf [file Supplementary_Data.pdf]

Figure S1. Association between mRNA expression levels of MMP1/9/12/16 and different clinicopathological parameters (age and nodal status) of breast carcinoma according to bc-GenExMiner v4.1.  $P < 0.05$  was considered as statistically significant. MMP, matrix metalloproteinase.

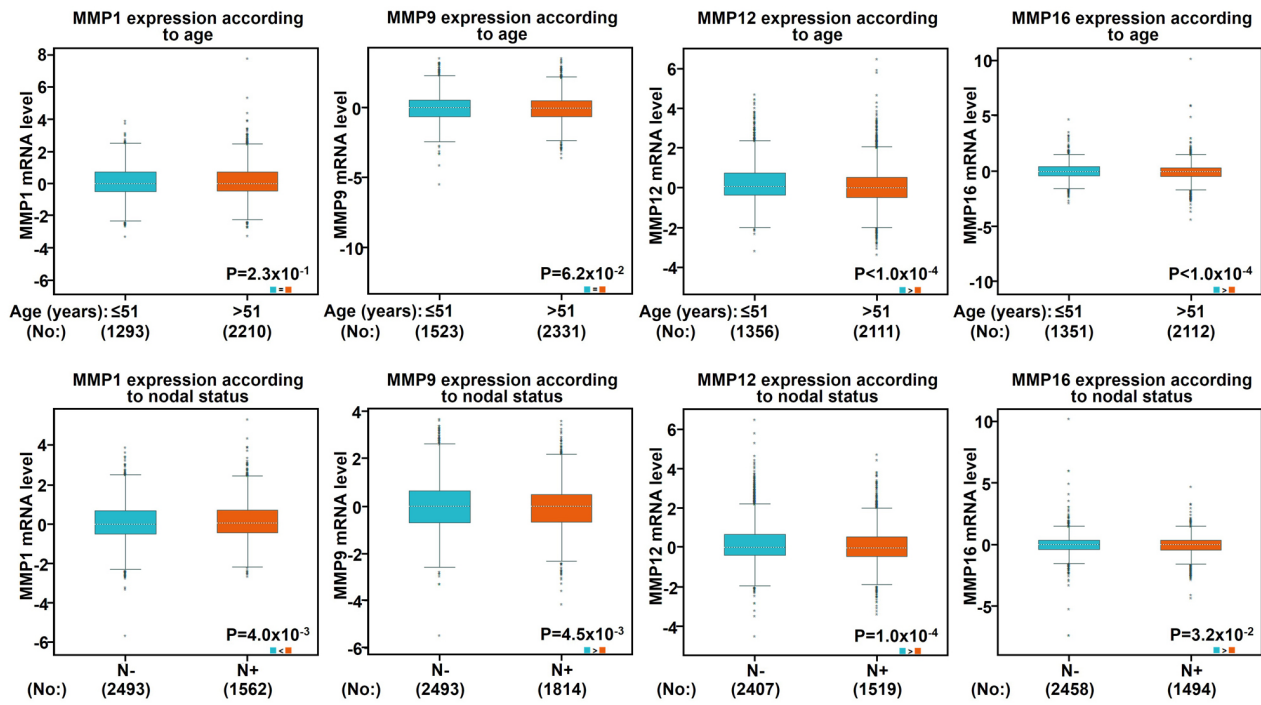

Table SI. Major differences of MMPs expression in transcription levels between different types of breast cancer and breast tissues (from ONCOMINE database).

| MMPs                            | Type                            | Fold-change       | P-value                | T-test                | (Refs.)                     |
|---------------------------------|---------------------------------|-------------------|------------------------|-----------------------|-----------------------------|
| MMP1                            | Ductal BC                       | 21.130            | $5.73 \times 10^{-14}$ | 10.813                | Richardson Breast 2 (15)    |
|                                 | Invasive BC                     | 11.611            | $6.48 \times 10^{-21}$ | 11.767                | TCGA Breast                 |
|                                 | Invasive Ductal BC              | 11.254            | $1.99 \times 10^{-53}$ | 21.477                | TCGA Breast                 |
|                                 | Invasive Lobular BC             | 3.972             | $2.14 \times 10^{-8}$  | 6.515                 | TCGA Breast                 |
|                                 | Mixed Lobular and Ductal BC     | 3.278             | $6.84 \times 10^{-5}$  | 6.306                 | TCGA Breast                 |
|                                 | Invasive Ductal BC Stroma       | 7.328             | $3.00 \times 10^{-3}$  | 3.660                 | Ma Breast 4 (63)            |
|                                 | Ductal BC in Situ Stroma        | 5.232             | $4.27 \times 10^{-4}$  | 4.565                 | Ma Breast 4 (63)            |
|                                 | Invasive Ductal BC Stroma       | 5.491             | $5.00 \times 10^{-3}$  | 3.003                 | Karnoub Breast (21)         |
|                                 | Ductal BC                       | 2.963             | $1.50 \times 10^{-2}$  | 3.358                 | Sorlie Breast (16)          |
|                                 | Ductal BC                       | 2.482             | $4.40 \times 10^{-2}$  | 2.873                 | Sorlie Breast 2 (17)        |
|                                 | Medullary BC                    | 2.006             | $1.98 \times 10^{-6}$  | 5.581                 | Curtis Breast (18)          |
| MMP3                            | Invasive Lobular BC             | 5.945             | $2.27 \times 10^{-12}$ | 8.436                 | TCGA Breast                 |
|                                 | Invasive BC                     | 5.671             | $3.72 \times 10^{-19}$ | 10.371                | TCGA Breast                 |
|                                 | Tubular BC                      | 2.419             | $2.25 \times 10^{-16}$ | 9.520                 | Curtis Breast (18)          |
|                                 | Invasive Lobular BC             | 2.008             | $7.00 \times 10^{-20}$ | 9.757                 | Curtis Breast (18)          |
|                                 | Invasive Ductal BC Stroma       | 3.241             | $2.00 \times 10^{-2}$  | 2.192                 | Ma Breast 4 (63)            |
|                                 | Ductal BC <i>in situ</i> Stroma | 2.508             | $2.40 \times 10^{-2}$  | 2.094                 | Ma Breast 4 (63)            |
|                                 | Invasive BC stroma              | 3.082             | $2.93 \times 10^{-9}$  | 6.849                 | Finak Breast (64)           |
|                                 | Invasive mixed BC               | 2.092             | $3.10 \times 10^{-2}$  | 2.238                 | Radvanyi Breast 19)         |
| MMP9                            | Medullary BC                    | 9.238             | $3.02 \times 10^{-14}$ | 11.125                | Curtis Breast (18)          |
|                                 | Ductal BC <i>in situ</i>        | 6.629             | $5.23 \times 10^{-7}$  | 9.200                 | Curtis Breast (18)          |
|                                 | Invasive ductal BC              | 4.378             | $8.46 \times 10^{-46}$ | 19.204                | Curtis Breast (18)          |
|                                 | Mucinous BC                     | 3.508             | $1.43 \times 10^{-10}$ | 7.414                 | Curtis Breast (18)          |
|                                 | Intraductal cribriform BC       | 5.463             | $1.05 \times 10^{-6}$  | 10.679                | TCGA Breast                 |
|                                 | Mucinous BC                     | 4.783             | $1.94 \times 10^{-11}$ | 9.399                 | TCGA Breast                 |
|                                 | Invasive BC                     | 3.245             | $2.97 \times 10^{-16}$ | 9.711                 | TCGA Breast                 |
|                                 | Invasive lobular BC             | 2.477             | $1.34 \times 10^{-8}$  | 6.103                 | TCGA Breast                 |
|                                 | Ductal BC                       | 8.256             | $1.43 \times 10^{-4}$  | 5.637                 | Richardson Breast 2 (15)    |
|                                 | Invasive ductal BC              | 4.043             | $3.00 \times 10^{-3}$  | 3.389                 | Radvanyi Breast (19)        |
|                                 | Invasive mixed BC               | 3.465             | $7.00 \times 10^{-3}$  | 3.476                 | Radvanyi Breast (19)        |
|                                 | Invasive ductal BC              | 3.640             | $2.70 \times 10^{-2}$  | 2.577                 | Turashvili Breast (20)      |
|                                 | Invasive Ductal BC stroma       | 3.575             | $1.60 \times 10^{-2}$  | 2.471                 | Karnoub Breast (21)         |
|                                 | Invasive BC stroma              | 3.450             | $1.23 \times 10^{-10}$ | 10.463                | Finak Breast 64)            |
|                                 | Ductal BC <i>in situ</i> stroma | 3.033             | $1.00 \times 10^{-3}$  | 3.815                 | Ma Breast 4 (63)            |
|                                 | Invasive ductal BC stroma       | 2.426             | $3.30 \times 10^{-2}$  | 2.093                 | Ma Breast 4 (63)            |
|                                 | Lobular BC                      | 2.929             | $2.20 \times 10^{-2}$  | 2.883                 | Perou Breast (65)           |
|                                 | MMP10                           | Invasive BC       | 2.631                  | $9.75 \times 10^{-4}$ | 7.204                       |
| Invasive BC                     |                                 | 6.767             | $1.08 \times 10^{-15}$ | 8.986                 | TCGA Breast                 |
| Invasive ductal BC              |                                 | 4.265             | $6.81 \times 10^{-18}$ | 10.220                | TCGA Breast                 |
| Invasive lobular BC             |                                 | 4.130             | $7.11 \times 10^{-8}$  | 5.964                 | TCGA Breast                 |
| Ductal BC <i>in situ</i> stroma |                                 | 3.904             | $8.00 \times 10^{-3}$  | 2.853                 | Ma Breast 4 (63)            |
| Invasive BC stroma              |                                 | 2.749             | $4.38 \times 10^{-8}$  | 9.225                 | Finak Breast 64)            |
| Invasive ductal BC              |                                 | 2.596             | $2.90 \times 10^{-2}$  | 2.202                 | Turashvili Breast (20)      |
| MMP11                           | All types of BC                 | >2.000            | $<5.00 \times 10^{-2}$ | >2.000                | Except Radvanyi Breast (19) |
|                                 | Ductal BC <i>in situ</i>        | 2.639             | $8.50 \times 10^{-2}$  | 1.597                 | Radvanyi Breast (19)        |
|                                 | Invasive ductal BC stroma       | 188.233 (highest) | $1.09 \times 10^{-17}$ | 9.766                 | Karnoub Breast (21)         |
| MMP12                           | Ductal BC                       | 5.563             | $4.39 \times 10^{-6}$  | 5.039                 | Richardson Breast 2 (15)    |
|                                 | Medullary BC                    | 4.375             | $1.63 \times 10^{-7}$  | 6.451                 | Curtis Breast (18)          |
|                                 | Invasive BC                     | 3.970             | $2.07 \times 10^{-9}$  | 6.336                 | TCGA Breast                 |
|                                 | Invasive ductal BC              | 3.245             | $3.67 \times 10^{-14}$ | 8.405                 | TCGA Breast                 |
|                                 | Invasive BC stroma              | 2.743             | $1.56 \times 10^{-7}$  | 5.822                 | Finak Breast (64)           |
|                                 | Ductal BC <i>in situ</i> stroma | 2.306             | $1.20 \times 10^{-2}$  | 2.632                 | Ma Breast 4 (63)            |
|                                 | Invasive ductal BC              | 2.035             | $9.00 \times 10^{-3}$  | 2.857                 | Turashvili Breast (20)      |
| MMP13                           | Invasive ductal BC              | 14.068            | $1.53 \times 10^{-56}$ | 23.706                | TCGA Breast                 |
|                                 | Invasive BC                     | 23.549            | $2.57 \times 10^{-34}$ | 17.610                | TCGA Breast                 |
|                                 | Invasive lobular BC             | 10.617            | $1.98 \times 10^{-13}$ | 10.059                | TCGA Breast                 |
|                                 | Ductal BC                       | 4.006             | $5.29 \times 10^{-9}$  | 7.519                 | Richardson Breast 2 (15)    |
|                                 | Invasive ductal BC Stroma       | 4.419             | $6.06 \times 10^{-4}$  | 4.047                 | Ma Breast 4 (63)            |

Table SI. Continued.

| MMPs | Type                      | Fold-change | P-value               | T-test | (Refs.)              |
|------|---------------------------|-------------|-----------------------|--------|----------------------|
|      | Invasive BC               | 3.714       | $5.00 \times 10^{-3}$ | 4.901  | Gluck Breast (66)    |
|      | Invasive ductal BC Stroma | 4.743       | $1.20 \times 10^{-2}$ | 2.811  | Karnoub Breast (21)  |
|      | Fibro adenoma             | 11.766      | $1.50 \times 10^{-2}$ | 3.665  | Sorlie Breast (16)   |
|      | Ductal BC                 | 5.096       | $4.20 \times 10^{-2}$ | 2.400  | Sorlie Breast (16)   |
|      | Fibro adenoma             | 7.336       | $2.30 \times 10^{-2}$ | 3.482  | Sorlie Breast 2 (17) |
|      | Lobular BC                | 4.045       | $3.90 \times 10^{-2}$ | 2.506  | Perou Breast (65)    |

MMP, matrix metalloproteinases; BC, breast cancer.
